# Supplementary material for: Patterns of Multimorbidity
Source: bioRxiv or medRxiv preprint supplement (doi:10.1101/2021.05.13.21256888), 2021-05-14
Supplement: Supplementary file [file media-1.pdf]

# Patterns of Multimorbidity (Appendix)

Kien Wei Siah<sup>1,2</sup>, Chi Heem Wong<sup>1,2</sup>, Jerry Gupta<sup>3</sup>, Andrew W. Lo<sup>1,2,4,\*</sup>

<sup>1</sup>Laboratory for Financial Engineering, Sloan School of Management, Massachusetts Institute of Technology, Cambridge, Massachusetts, United States of America; <sup>2</sup>Department of Electrical Engineering and Computer Science, Massachusetts Institute of Technology, Cambridge, Massachusetts, United States of America; <sup>3</sup>Digital Catalyst, Swiss Re, Cambridge, Massachusetts, United States of America; <sup>4</sup>Sante Fe Institute, Santa Fe, New Mexico, United States of America

\*Corresponding author: Andrew W. Lo, MIT Sloan School of Management, 100 Main Street, E62-618, Cambridge, MA 02142. (617) 253-0920 (tel), (781) 891-9783 (fax), [alo-admin@mit.edu](mailto:alo-admin@mit.edu) (email).

**This version: 8 May 2021**

# A Definitions

**Table 1. Age groups based on MeSH definitions.**

| Group       | Age               |
|-------------|-------------------|
| Infant      | 0 to 2 years      |
| Child       | 2 to 13 years     |
| Adolescent  | 13 to 19 years    |
| Adult       | 19 to 45 years    |
| Middle-Aged | 45 to 65 years    |
| Aged        | 65 to 80 years    |
| Elderly     | 80 years and over |

**Table 2. List of morbidities and MedDRA System Organ Classes.**

| No. | Disease                 | MedDRA                                          | Abbrev. |
|-----|-------------------------|-------------------------------------------------|---------|
| 1   | Angina                  | Cardiac Disorders                               | Card    |
| 2   | Atrial Fibrillation     | Cardiac Disorders                               | Card    |
| 3   | Coronary Artery Disease | Cardiac Disorders                               | Card    |
| 4   | Cardiac Arrhythmia      | Cardiac Disorders                               | Card    |
| 5   | Heart Failure           | Cardiac Disorders                               | Card    |
| 6   | Heart Valve Disorder    | Cardiac Disorders                               | Card    |
| 7   | Myocardial Infarction   | Cardiac Disorders                               | Card    |
| 8   | Cardiac-related         | Cardiac Disorders                               | Card    |
| 9   | Thyroid Cancer          | Endocrine Disorders                             | En      |
| 10  | Esophageal Cancer       | Gastrointestinal Disorders                      | GI      |
| 11  | Stomach Cancer          | Gastrointestinal Disorders                      | GI      |
| 12  | Liver Disease           | Hepatobiliary Disorders                         | Hep     |
| 13  | Liver-related           | Hepatobiliary Disorders                         | Hep     |
| 14  | Asthma                  | Immune System Disorders                         | Imm     |
| 15  | HIV/AIDS                | Immune System Disorders                         | Imm     |
| 16  | Multiple Sclerosis      | Immune System Disorders                         | Imm     |
| 17  | Diabetes                | Metabolism and Nutrition Disorders              | Me      |
| 18  | Lupus                   | Musculoskeletal and Connective Tissue Disorders | Mu      |
| 19  | Breast Cancer           | Neoplasms Benign, Malignant and Unspecified     | Neop    |
| 20  | Cervix Cancer           | Neoplasms Benign, Malignant and Unspecified     | Neop    |
| 21  | Colorectal Cancer       | Neoplasms Benign, Malignant and Unspecified     | Neop    |
| 22  | Leukemias               | Neoplasms Benign, Malignant and Unspecified     | Neop    |
| 23  | Liver Cancer            | Neoplasms Benign, Malignant and Unspecified     | Neop    |
| 24  | Lung Cancer             | Neoplasms Benign, Malignant and Unspecified     | Neop    |
| 25  | Melanoma                | Neoplasms Benign, Malignant and Unspecified     | Neop    |

|    |                                          |                                                 |      |
|----|------------------------------------------|-------------------------------------------------|------|
| 26 | Cancer-related                           | Neoplasms Benign, Malignant and Unspecified     | Neop |
| 27 | Pancreas Cancer                          | Neoplasms Benign, Malignant and Unspecified     | Neop |
| 28 | Encephalitis                             | Nervous System Disorders                        | Nerv |
| 29 | Parkinson's Disease                      | Nervous System Disorders                        | Nerv |
| 30 | Stroke                                   | Nervous System Disorders                        | Nerv |
| 31 | Stroke Related                           | Nervous System Disorders                        | Nerv |
| 32 | Dementia                                 | Psychiatric Disorders                           | Ps   |
| 33 | Bladder Cancer                           | Renal and Urinary Disorders                     | Ren  |
| 34 | Kidney Disease                           | Renal and Urinary Disorders                     | Ren  |
| 35 | Kidney-related                           | Renal and Urinary Disorders                     | Ren  |
| 36 | Ovarian Cancer                           | Reproductive System and Breast Disorders        | Repr |
| 37 | Prostate Cancer                          | Reproductive System and Breast Disorders        | Repr |
| 38 | Testicular Cancer                        | Reproductive System and Breast Disorders        | Repr |
| 39 | Uterus Cancer                            | Reproductive System and Breast Disorders        | Repr |
| 40 | Chronic Obstructive<br>Pulmonary Disease | Respiratory, Thoracic and Mediastinal Disorders | Res  |
| 41 | Respiratory-related                      | Respiratory, Thoracic and Mediastinal Disorders | Res  |
| 42 | Aortic Aneurysm                          | Vascular Disorders                              | Vas  |
| 43 | Hypertension                             | Vascular Disorders                              | Vas  |
| 44 | Other Aneurysms                          | Vascular Disorders                              | Vas  |
| 45 | Peripheral Artery Disease                | Vascular Disorders                              | Vas  |
| 46 | Transient Ischemic Attack                | Vascular Disorders                              | Vas  |

---

## B Sample Size for Index of Multiple Deprivation

| Millions          | 2008       | 2009        | 2010        | 2011        | 2012        | 2013        | 2014        | 2015        | 2016        |
|-------------------|------------|-------------|-------------|-------------|-------------|-------------|-------------|-------------|-------------|
| Total             | 5.1        | 5.1         | 5.0         | 5.0         | 4.9         | 4.6         | 4.2         | 3.5         | 3.1         |
| With IMD          | 0.3        | 2.1         | 2.2         | 2.1         | 2.1         | 1.9         | 1.8         | 1.4         | 1.2         |
| <i>% of Total</i> | <i>5.2</i> | <i>42.0</i> | <i>43.4</i> | <i>41.3</i> | <i>43.4</i> | <i>41.6</i> | <i>42.0</i> | <i>39.8</i> | <i>37.2</i> |

## C Supplementary Figures

Supplementary plots for all age groups and years at available at <https://www.dropbox.com/sh/iljxpdl783zy1m/AAAFy2fHIW0N40Zvzv7srj7a?dl=0>.

## D Survival Analysis

Table 3. Test set C-index of survival models.

| Year | <u>Test Set C-index (95% CI)</u> |                      | Accelerated Failure<br>Time | Neural Network<br>Survival |
|------|----------------------------------|----------------------|-----------------------------|----------------------------|
|      | Cox                              | Regularized Cox      |                             |                            |
| 2010 | 0.793 (0.790, 0.797)             | 0.793 (0.790, 0.797) | 0.793 (0.790, 0.797)        | 0.794 (0.790, 0.797)       |
| 2011 | 0.798 (0.795, 0.802)             | 0.798 (0.795, 0.802) | 0.798 (0.795, 0.802)        | 0.798 (0.794, 0.801)       |
| 2012 | 0.807 (0.803, 0.811)             | 0.807 (0.804, 0.812) | 0.799 (0.795, 0.804)        | 0.806 (0.802, 0.810)       |
